# Supplementary material for: Does community-based distribution of HIV self-tests increase uptake of HIV testing? Results of pair-matched cluster randomised trial in Zambia
Source: HighWire-hosted journal article supplement (doi:10.1136/bmjgh-2020-004543), 2021-07-01

Does community-based distribution of HIV self-tests increase uptake of HIV testing? Results of pair-matched cluster randomised trial in Zambia

Supplemental figure 1. Process evaluation framework

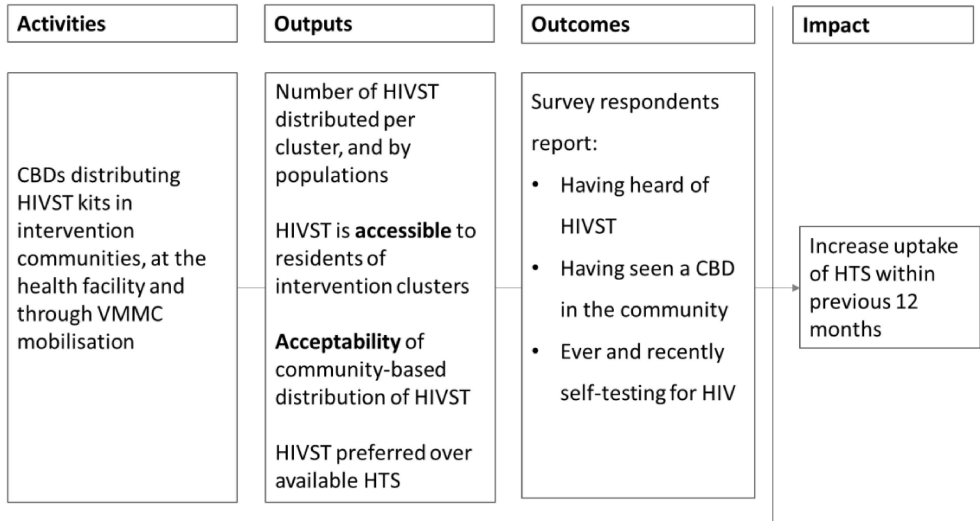

Supplement: bmjgh-2020-004543supp001_data_supplement.pdf [file bmjgh-2020-004543supp001_data_supplement.pdf]
