# Supplementary material for: Does community-based distribution of HIV self-tests increase uptake of HIV testing? Results of pair-matched cluster randomised trial in Zambia
Source: HighWire-hosted journal article supplement (doi:10.1136/bmjgh-2020-004543), 2021-07-01
Supplement: bmjgh-2020-004543supp002_data_supplement.pdf [file bmjgh-2020-004543supp002_data_supplement.pdf]

Does community-based distribution of HIV self-tests increase uptake of HIV testing? Results of pair-matched cluster randomised trial in Zambia

**Supplemental Table 1. Recent HIV testing outcome by intervention status and subgroup**

|                                                        | HIVST intervention |           |                     | SOC       |           |                     | Unadjusted |              |                    | Adjusted*  |              |                    | Interaction p-value** |
|--------------------------------------------------------|--------------------|-----------|---------------------|-----------|-----------|---------------------|------------|--------------|--------------------|------------|--------------|--------------------|-----------------------|
|                                                        | n/N                | Overall % | Cluster geo. Mean % | n/N       | Overall % | Cluster geo. Mean % | Risk ratio | 95% CI       | Risk ratio p-value | Risk ratio | 95% CI       | Risk ratio p-value |                       |
| <b>Recent HIV testing by gender</b>                    |                    |           |                     |           |           |                     |            |              |                    |            |              |                    |                       |
| Men                                                    | 586/1,022          | 57.3      | 55.2                | 491/948   | 51.8      | 50.1                | 1.10       | (0.89, 1.36) | 0.136              | 1.07       | (0.89, 1.29) | 0.382              | 0.305                 |
| Women                                                  | 1,040/1,450        | 71.7      | 69.7                | 961/1,474 | 65.1      | 64.9                | 1.28       | (0.17, 0.00) | 0.000              | 1.08       | (0.89, 1.31) | 0.367              |                       |
| <b>Recent HIV testing by age</b>                       |                    |           |                     |           |           |                     |            |              |                    |            |              |                    |                       |
| Under 25 years                                         | 560/903            | 62.0      | 59.6                | 465/822   | 56.6      | 55.6                | 1.07       | (0.91, 1.27) | 0.243              | 1.08       | (0.92, 1.26) | 0.273              | 0.092                 |
| 25 years and older                                     | 1,066/1,569        | 67.9      | 65.5                | 987/1,600 | 61.7      | 60.4                | 1.08       | (0.89, 1.32) | 0.164              | 1.10       | (0.92, 1.32) | 0.234              |                       |
| <b>Recent HIV testing by educational attainment***</b> |                    |           |                     |           |           |                     |            |              |                    |            |              |                    |                       |
| No or incomplete primary formal schooling              | 829/1,245          | 66.6      | 62.5                | 715/1,182 | 60.5      | 56.1                | 1.11       | (0.89, 1.39) | 0.166              | 1.14       | (0.95, 1.36) | 0.127              | 0.556                 |
| Primary complete and some secondary education          | 520/817            | 63.6      | 64.0                | 492/819   | 60.5      | 60.2                | 1.06       | (0.80, 1.41) | 0.402              | 1.06       | (0.83, 1.34) | 0.592              |                       |
| Secondary complete, college or higher                  | 276/817            | 67.5      | 67.4                | 244/420   | 58.1      | 61.5                | 1.10       | (0.92, 1.31) | 0.248              | 1.08       | (0.89, 1.30) | 0.380              |                       |

\* Adjusted for age in years (16-19 yrs., 20-24 yrs., 25-29 yrs., 30-39 yrs., 40-49 yrs., 50-59 yrs., 60 yrs.+), assets index in tertiles, and pair.

\*\* Interaction p-value calculated for adjusted models only

\*\*\* 2 respondents missing data on educational attainment
